# Supplementary material for: Cirrhosis-related sarcopenia may not resolve after liver transplantation
Source: PubMed Central journal article supplement — JHEP Rep. 2023 Aug 16;5(11):100881. doi: 10.1016/j.jhepr.2023.100881 (PMC10522892; doi:10.1016/j.jhepr.2023.100881), 2023-08-16
Supplement: mmc1.pdf [file mmc1.pdf]

# **Cirrhosis-related sarcopenia may not resolve after liver transplantation**

Sara Brown, Brooks Richardson, Erin Bouquet, Elise Reid, Evan Mercer, Michael  
Goncalves, Ashley Spann, Jeffrey Annis, Evan Brittain, Anthony Dreher, Sophoclis  
Alexopoulos, James C Slaughter, Heidi J. Silver, Manhal Izzy

Table of contents

|               |   |
|---------------|---|
| Table S1..... | 2 |
| Table S2..... | 2 |

Table S1. Median baseline characteristics of 409 excluded patients compared to the study cohort and standardized mean difference (SMD) to evaluate balance between groups.

|                                      | Study Cohort (N=401) | Excluded Cohort (N=409) | SMD   |
|--------------------------------------|----------------------|-------------------------|-------|
| Age (median [IQR])                   | 57 [51,63]           | 58 [53,64]              | 0.153 |
| Etiology (n, %)                      |                      |                         | 0.225 |
| NASH                                 | 108 (26.9%)          | 123 (30.1%)             |       |
| Alcohol                              | 101 (25.2%)          | 87 (21.3%)              |       |
| Viral                                | 121 (30.2%)          | 97 (23.7%)              |       |
| Autoimmune                           | 37 (9.2%)            | 54 (13.2%)              |       |
| Other                                | 34 (8.5%)            | 48 (11.7%)              |       |
| Male sex (n, %)                      | 252 (62.8%)          | 253 (61.9%)             | 0.020 |
| MELD-Na at transplant (median [IQR]) | 22 [15,29]           | 25 [22,28]              | 0.453 |

Table S2. Association of baseline sarcopenia on secondary outcomes. T-cell mediated rejection, infectious and biliary complications, physical rehabilitation, readmission were all within 90 days of hospital discharge.

| Outcome                          | No sarcopenia, median [IQR] or N (%) | Sarcopenia, median [IQR] or N (%) |
|----------------------------------|--------------------------------------|-----------------------------------|
| ICU LOS, days, [IQR]             | 3 (2-5)                              | 3 (2-5)                           |
| Index hospital LOS, days, [IQR]  | 8 (6-16)                             | 7 (6-11)                          |
| Post-LT LOS, days, [IQR]         | 7 (5-11)                             | 7 (5-9)                           |
| Vent days, days [IQR]            | 0 (0-0)                              | 0 (0-0.25)                        |
| Surgery Duration, min [IQR]      | 305 (261-351)                        | 296 (253-352)                     |
| T-cell mediated rejection, % (N) | 22 (7%)                              | 12 (12%)                          |
| Infectious complications, % (N)  | 100 (33%)                            | 31 (31%)                          |
| Biliary complications, % (N)     | 102 (34%)                            | 27 (27%)                          |
| Physical Rehabilitation, % (N)   | 159 (53%)                            | 54 (54%)                          |
| Readmission % (N)                | 135 (45%)                            | 46 (46%)                          |
